# Supplementary material for: Two Novel Homozygous HPS6 Mutations (Double Mutant) Identified by Whole-Exome Sequencing in a Saudi Consanguineous Family Suspected for Oculocutaneous Albinism
Source: MDPI journal article supplement (doi:10.3390/life12010014), 2021-12-23
Supplement: s1 [file s1]

Supplementary Table 1: List of clinically significant variants of HPS6 gene

| S.No | SNP ID       | Clinical Significance | Variation                                             | Type       |
|------|--------------|-----------------------|-------------------------------------------------------|------------|
| 1    | rs1590262450 | Pathogenic            | NM_024747.5(HPS6):c.155delT (p.Val52fs)               | Frameshift |
| 2    | rs1590263807 | Pathogenic            | NM_024747.5(HPS6):c.1624delG (p.Asp542fs)             | Frameshift |
| 3    | rs1131692332 | Pathogenic            | NM_024747.5(HPS6):c.1898delC (p.Pro633fs)             | Frameshift |
| 4    | rs1131692333 | Pathogenic            | NM_024747.5(HPS6):c.2038C>T (p.Gln680Ter)             | Nonsense   |
| 5    | rs1220869113 | Pathogenic            | NM_024747.5(HPS6):c.1711_1712insAG (p.Cys571Ter)      | Nonsense   |
| 6    | rs1564899492 | Pathogenic            | NM_024747.5(HPS6):c.1065dupG (p.Leu356fs)             | Frameshift |
| 7    | rs281865107  | Pathogenic            | NM_024747.5(HPS6):c.223C>T (p.Gln75Ter)               | Nonsense   |
| 8    | rs281865109  | Pathogenic            | NM_024747.5(HPS6):c.815C>T (p.Thr272Ile)              | Missense   |
| 9    | rs281865110  | Pathogenic            | NM_024747.5(HPS6):c.913C>T (p.Gln305Ter)              | Nonsense   |
| 10   | rs281865112  | Pathogenic            | NM_024747.5(HPS6):c.1234C>T (p.Gln412Ter)             | Nonsense   |
| 11   | rs281865113  | Pathogenic            | NM_024747.5(HPS6):c.1714_1717delTGTC (p.Leu572fs)     | Frameshift |
| 12   | rs281865114  | Pathogenic            | NM_024747.5(HPS6):c.1865_1866delTG (p.Leu622fs)       | Frameshift |
| 13   | rs1564899012 | Pathogenic            | NM_024747.5(HPS6):c.283delG (p.Val95fs)               | Frameshift |
| 14   | rs1564899951 | Pathogenic            | NM_024747.5(HPS6):c.1864_1871delGCTCTGGA (p.Leu622fs) | Frameshift |
| 15   | rs1478574193 | Likely Pathogenic     | NM_024747.5(HPS6):c.779G>A (p.Gly260Glu)              | Missense   |
| 16   | rs1590263820 | Likely Pathogenic     | NM_024747.5(HPS6):c.1649delG (p.Gly550fs)             | Frameshift |
| 17   | rs756325364  | Likely Pathogenic     | NM_024747.6(HPS6):c.823C>T (p.Pro275Ser)              | Missense   |
| 18   | rs756471925  | Likely Pathogenic     | NM_024747.6(HPS6):c.706_707delTC (p.Ser236fs)         | Frameshift |
| 19   | 1050563      | Likely Pathogenic     | NM_024747.6(HPS6):c.206_210dupCGGGC (p.Trp71fs)       | Frameshift |
| 20   | 996365       | Likely Pathogenic     | NM_024747.6(HPS6):c.1999C>T (p.Arg667Ter)             | Nonsense   |
| 21   | 996366       | Likely Pathogenic     | NM_024747.6(HPS6):c.335G>A (p.Trp112Ter)              | Nonsense   |
| 22   | 996367       | Likely Pathogenic     | NM_024747.6(HPS6):c.1732C>T (p.Arg578Ter)             | Nonsense   |
| 23   | rs1554903728 | Likely Pathogenic     | NM_024747.5(HPS6):c.1693T>G (p.Phe565Val)             | Missense   |
| 24   | rs1590262288 | Likely Pathogenic     | NM_024747.6(HPS6):c.19_20delCT (p.Leu7fs)             | Frameshift |
| 25   | rs763073715  | Likely Pathogenic     | NM_024747.6(HPS6):c.1A>G (p.Met1Val)                  | Missense   |
